# Supplementary material for: 4-Amino-TEMPO-Immobilized Polymer Monolith: Preparations, and Recycling Performance of Catalyst for Alcohol Oxidation
Source: MDPI journal article supplement (doi:10.3390/polym14235123), 2022-11-24
Supplement: s1 [file s1]

## Supporting Information

### 4-Amino-TEMPO-Immobilized Polymer Monolith: Preparations, and Recycling Performance of Catalyst for Alcohol Oxidation

#### 1. Poly (4-chloromethyl-*co*-divinylbenzene) (Cl-Monolith)

**Table S1.** Properties of Cl-Monolith-1, -2, -3, and -4 as characterized by MIP.

| Material      | DVB<br>[wt %] | Specific<br>Surface Area<br>[m <sup>2</sup> g <sup>-1</sup> ] | Average Pore<br>Diameter<br>[μm] | Median Pore<br>Diameter<br>[μm] | Porosity<br>[%] |
|---------------|---------------|---------------------------------------------------------------|----------------------------------|---------------------------------|-----------------|
| Cl-Monolith-1 | 20            | 1.1                                                           | 4.8                              | 17                              | 58              |
| Cl-Monolith-2 | 30            | 3.8                                                           | 1.9                              | 12                              | 63              |
| Cl-Monolith-3 | 40            | 27                                                            | 0.24                             | 12                              | 65              |
| Cl-Monolith-4 | 50            | 47                                                            | 0.15                             | 1.7                             | 66              |

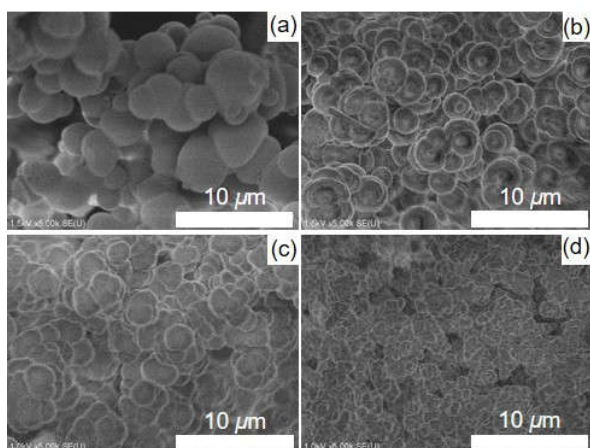

**Figure S1.** SEM images of Cl-Monolith (a) -1, (b) -2, (c) -3, and (d) -4.

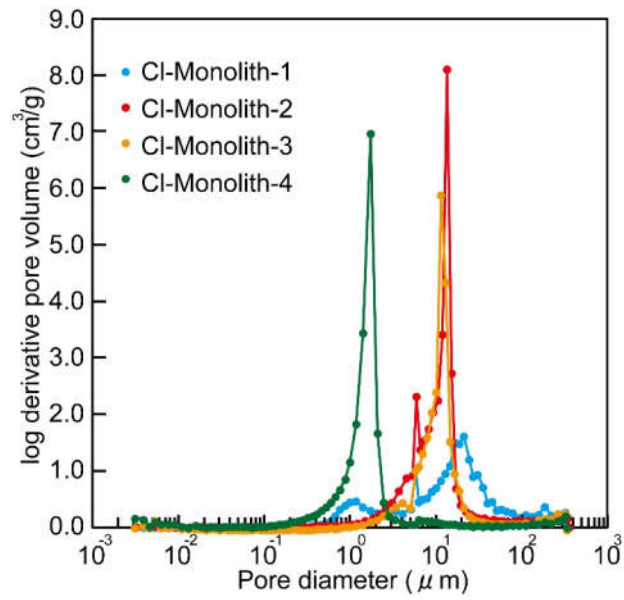

**Figure S2.** Pore size distribution of CI-Monolith-1, -2, -3, and -4 as characterized by MIP.

**Table S2.** The transmission coefficient of Cl-Monolith-1, -2, -3, and -4.

| Material      | DVB [wt %] | Trasmission Coefficient<br>[m <sup>2</sup> ] <sup>a</sup> |
|---------------|------------|-----------------------------------------------------------|
| Cl-Monolith-1 | 20         | $8.3 \times 10^{-12}$                                     |
| Cl-Monolith-2 | 30         | $3.1 \times 10^{-13}$                                     |
| Cl-Monolith-3 | 40         | $7.0 \times 10^{-14}$                                     |
| Cl-Monolith-4 | 50         | $3.7 \times 10^{-14}$                                     |

<sup>a</sup> calculated by Darcy's law.**2. 4-Amino-TEMPO-immobilized monolith (Monolith)****Table S3.** Properties of Monolith-1, -2, -3, and -4 as characterized by MIP.

| Material   | DVB<br>[wt %] | Specific<br>Surface Area<br>[m <sup>2</sup> g <sup>-1</sup> ] | Average Pore<br>Diameter<br>[μm] | Median Pore<br>Diameter<br>[μm] | Porosity [%] |
|------------|---------------|---------------------------------------------------------------|----------------------------------|---------------------------------|--------------|
| Monolith-1 | 20            | 0.85                                                          | 8.8                              | 14                              | 65           |
| Monolith-2 | 30            | 0.74                                                          | 8.4                              | 13                              | 61           |
| Monolith-3 | 40            | 18                                                            | 0.34                             | 4.3                             | 59           |
| Monolith-4 | 50            | 29                                                            | 0.23                             | 0.57                            | 64           |

**Table S4.** N content and 4-amino-TEMPO immobilization calculated from elemental analysis of Monoliths, and transmission coefficient.

| Material   | DVB [wt %] | N [mmol/g] <sup>a</sup> | 4-amino-TEMPO<br>[mmol/g] <sup>a</sup> | Trasmission<br>Coefficient<br>[m <sup>2</sup> ] <sup>b</sup> |
|------------|------------|-------------------------|----------------------------------------|--------------------------------------------------------------|
| Monolith-1 | 20         | 1.1                     | 0.53                                   | $5.7 \times 10^{-12}$                                        |
| Monolith-2 | 30         | 0.73                    | 0.36                                   | $4.1 \times 10^{-13}$                                        |
| Monolith-3 | 40         | 0.66                    | 0.33                                   | $7.3 \times 10^{-14}$                                        |
| Monolith-4 | 50         | 0.49                    | 0.24                                   | $3.5 \times 10^{-14}$                                        |

<sup>a</sup> calculated by elemental analysis, <sup>b</sup> calculated by Darcy's law.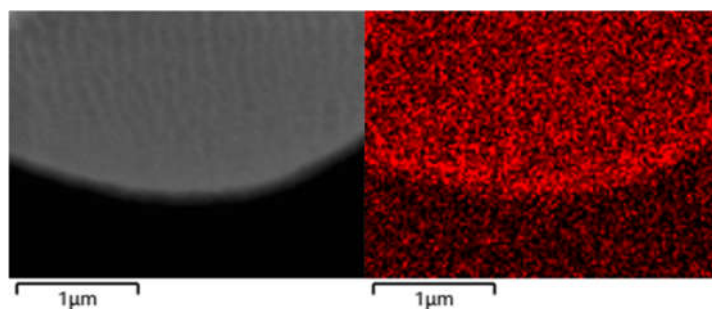**Figure S3.** SEM image (left) EDS image analyzing nitrogen (right) of Monolith-1.

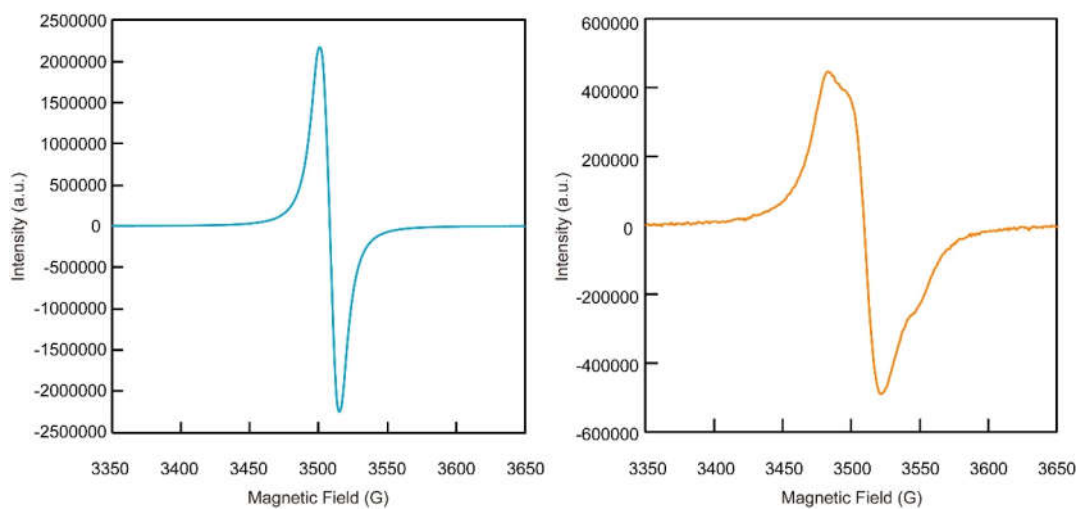

**Figure S4.** The ESR spectra of TEMPO (5 mg, left) and Monolith-1 (8 mg, right). The amount of 4-amino-TEMPO immobilized in Monolith-1, hypothetically calculated from two integrations of ESR spectra ranged from 0.43–0.69 mmol/g. (Calibration curves were prepared from ESR spectra of different amounts of TEMPO.) This value contains uncertainty due to the influence of radical interactions.

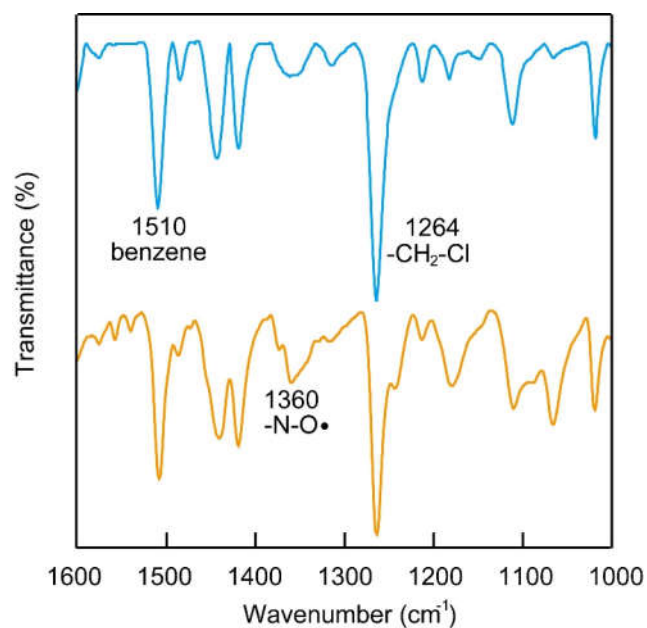

**Figure S5.** The FT-IR results of Cl-Monolith-1 (top) and Monolith-1 (bottom).

### 3. Flow behavior analysis of polymer monolith with tracers

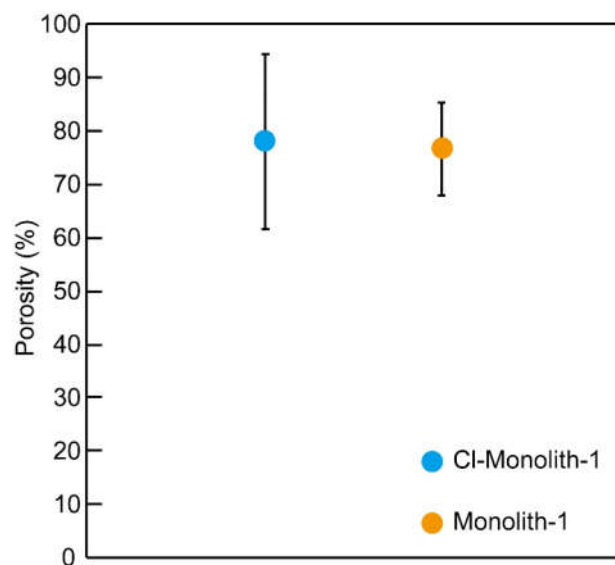

**Figure S6.** Porosity measurements in wetting states with benzene tracer in CH<sub>2</sub>Cl<sub>2</sub>/<sup>t</sup>BuOH (1:1, *v/v*).

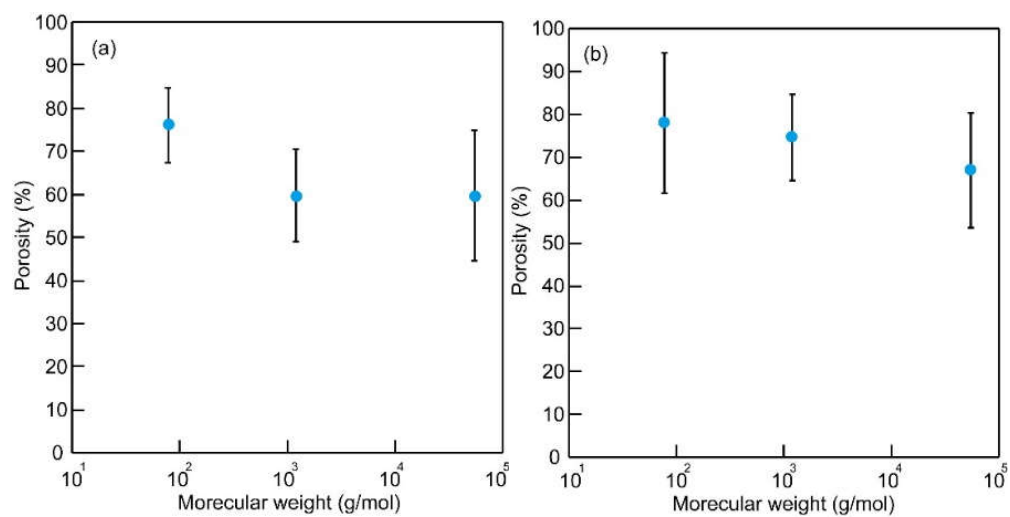

**Figure S7.** Porosity measurements in wetting states with benzene and polystyrene tracer in CH<sub>2</sub>Cl<sub>2</sub>/<sup>t</sup>BuOH (1:1, *v/v*): (a) Monolith-1 and (b) CI-Monolith-1.

#### 4. Flow oxidation reaction with Monolith-1

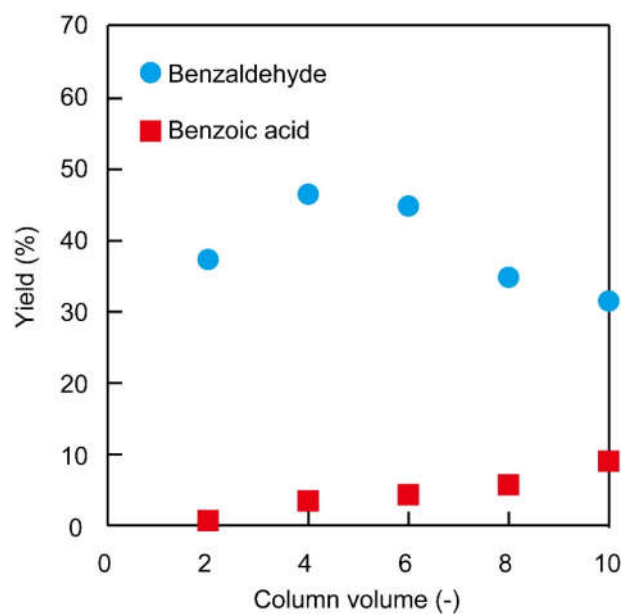

**Figure S8.** Results of flow oxidation of benzyl alcohol by Monolith-1 at a residence time of 2 min.

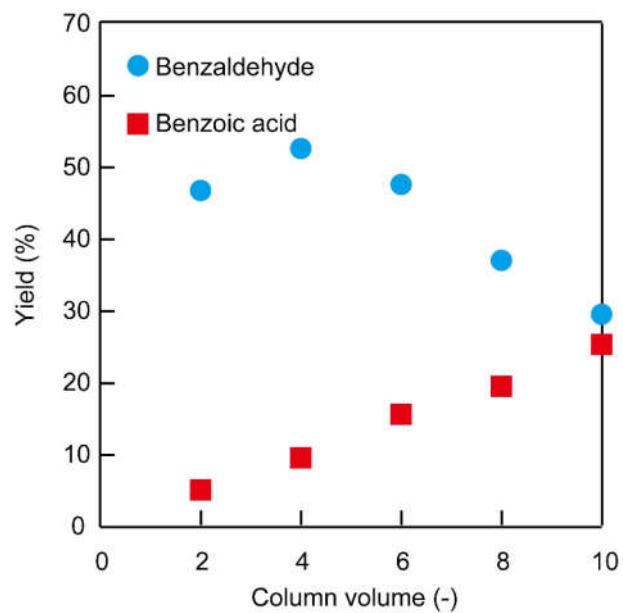

**Figure S9.** Results of flow oxidation of benzyl alcohol by Monolith-1 at a residence time of 8 min.

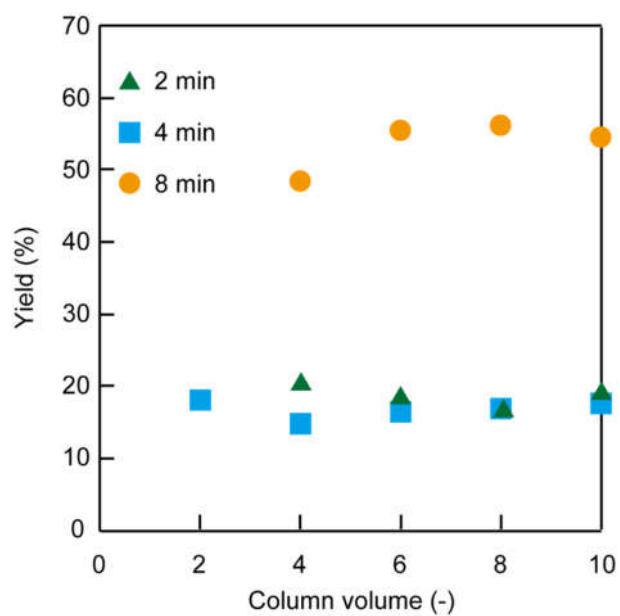

**Figure S10.** Results of flow oxidation of 2-phenylethanol by Monolith-1 at residence times of 2, 4, and 8 min.

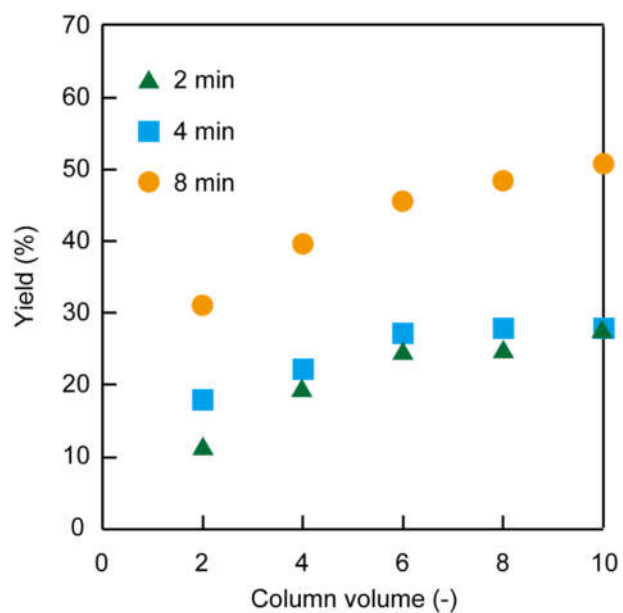

**Figure S11.** Results of flow oxidation of (+/-)-1-phenylethanol by Monolith-1 at residence times of 2, 4, and 8 min.
